# Supplementary material
Source: Springer Nature journal article supplement (https://www.springermedizin.de/resource/supplementary/12916_2014_984_MOESM2_ESM.pdf/9598764)

# Placebo VS Fluoxetine : Response

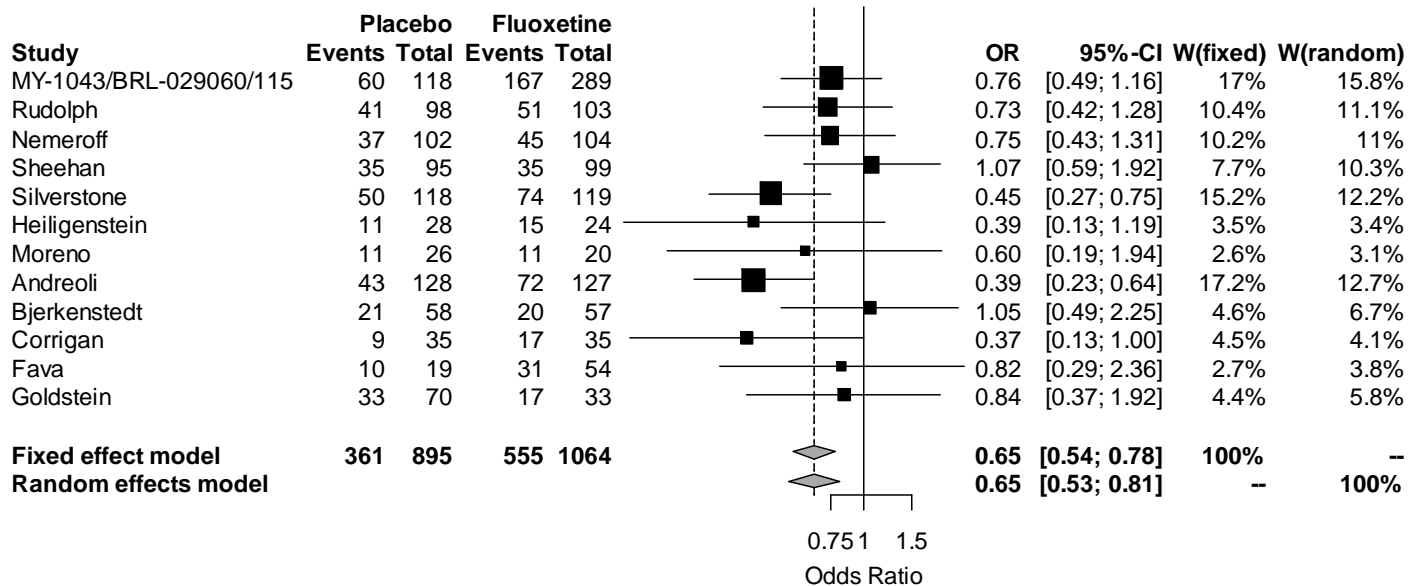

# Placebo VS Venlafaxine : Response

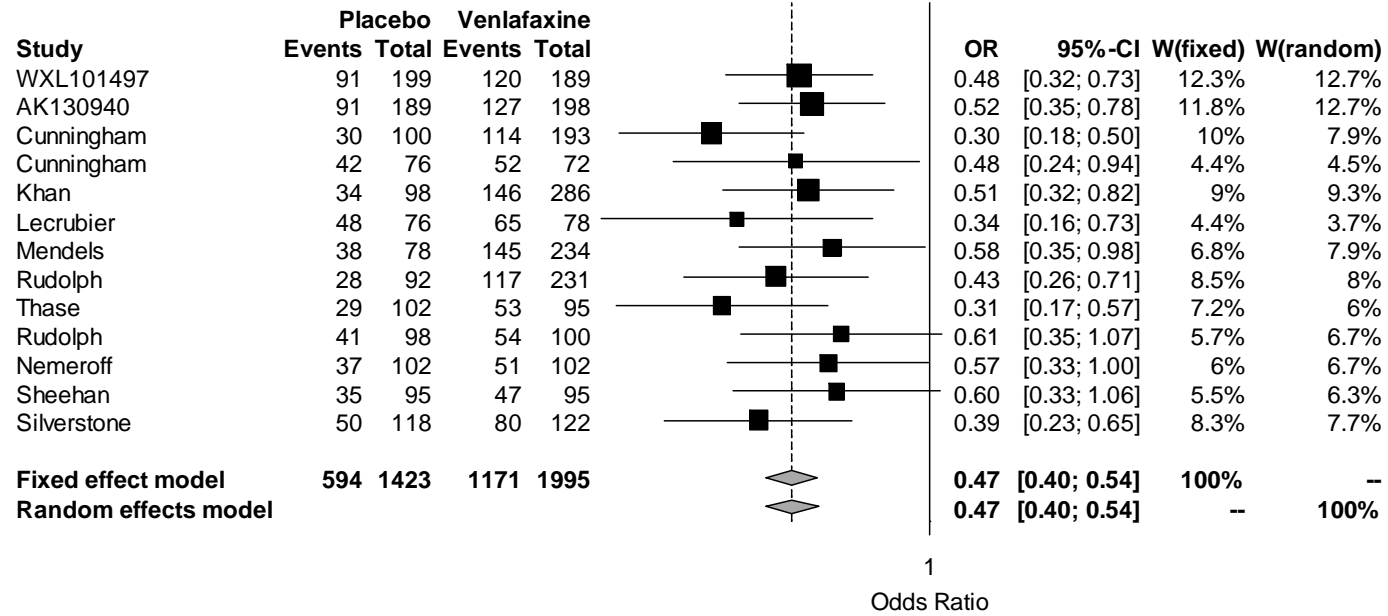

# Fluoxetine VS Venlafaxine : Response

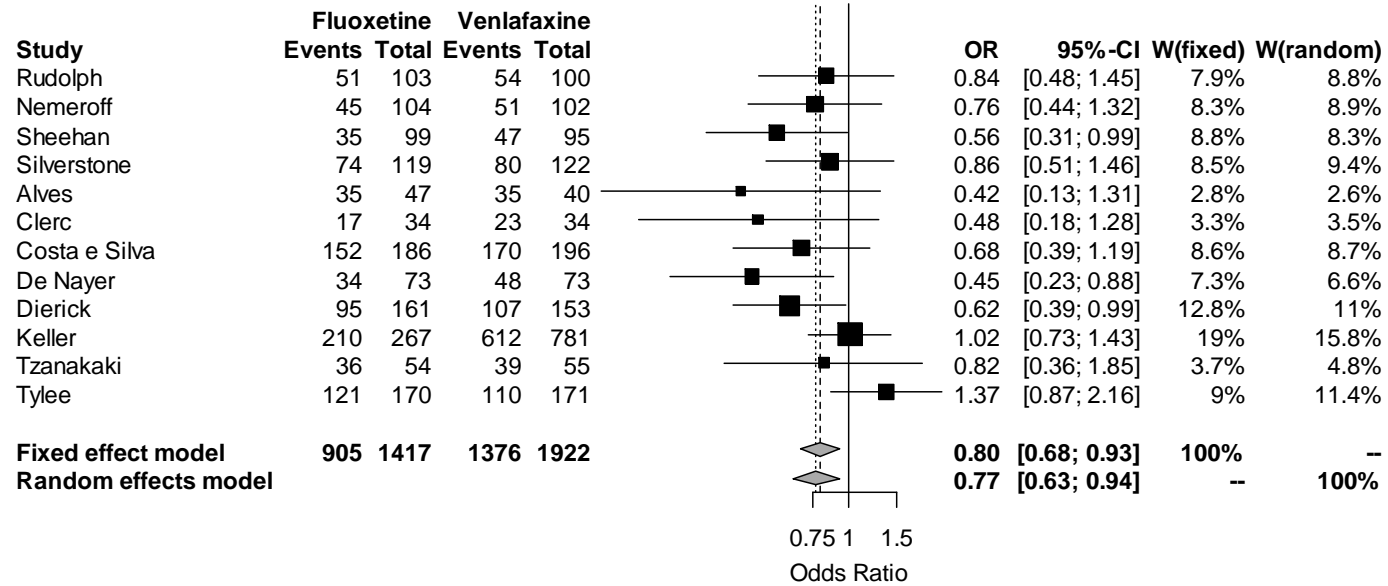

# Placebo VS Fluoxetine : Remission

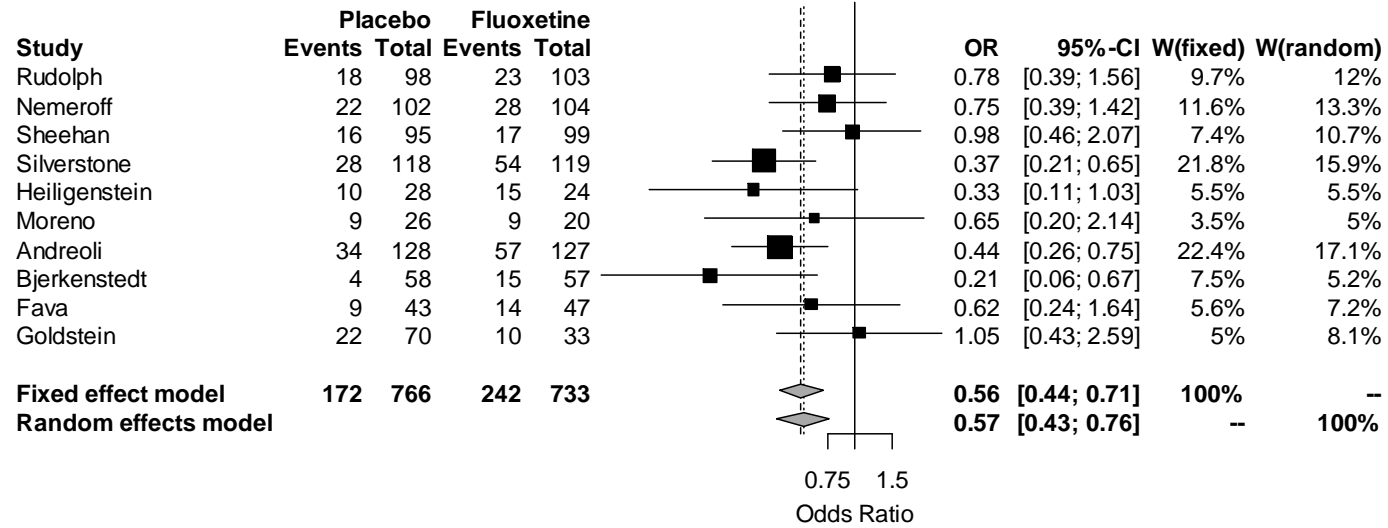

# Placebo VS Venlafaxine : Remission

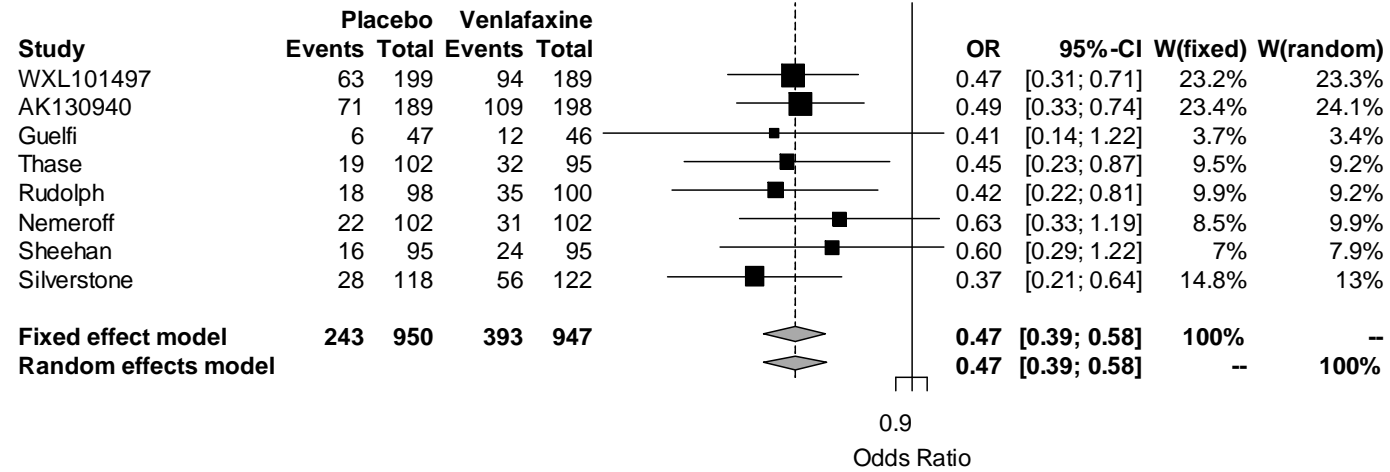

# Fluoxetine VS Venlafaxine : Remission

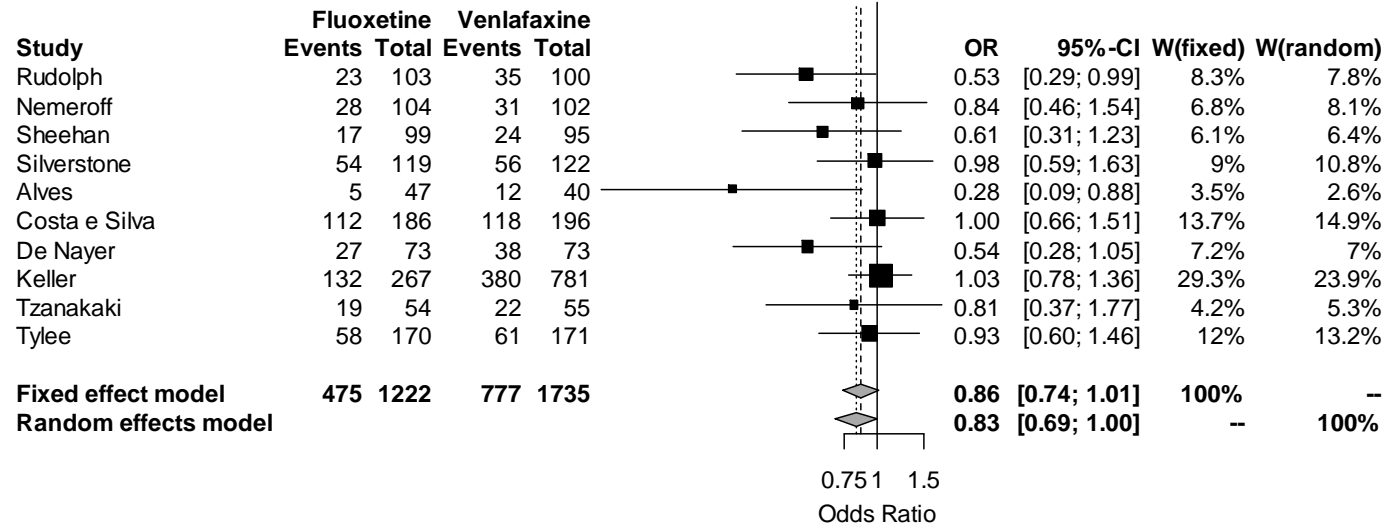

Supplement: MOESM2 [file 9598764]
